# Supplementary material
Source: PubMed Central journal article supplement (PMC4633787)
Supplement: CJN.03470315_CJN03470315SupplementaryData.pdf [file CJN.03470315_CJN03470315SupplementaryData.pdf]

# **Peritoneal Equilibration Test and Patient Outcomes**

## **SUPPLEMENTARY MATERIALS**

**Supplementary Table 1.** Comparison of baseline characteristics of patients included in the analyses from the ones excluded

|                                       | <b>Included<br/>N = 10,142</b> | <b>Excluded<br/>N = 8,135</b> | <b>P</b> |
|---------------------------------------|--------------------------------|-------------------------------|----------|
| <b>Age, years</b>                     | 56 ± 15                        | 56 ± 16                       | 0.01     |
| <b>Gender, % males</b>                | 57                             | 55                            | 0.004    |
| <b>Race</b>                           |                                |                               |          |
| White                                 | 58                             | 57                            | 0.17     |
| Black                                 | 23                             | 23                            | 0.32     |
| Hispanic                              | 12                             | 13                            | 0.35     |
| Others                                | 7                              | 7                             | 0.83     |
| <b>Cause of ESRD</b>                  |                                |                               |          |
| Diabetes                              | 40                             | 40                            | 0.97     |
| Hypertension                          | 27                             | 27                            | 0.98     |
| Others                                | 33                             | 33                            | 0.99     |
| <b>h/o previous transplant, %</b>     | 3                              | 2                             | 0.13     |
| <b>h/o prior treatment with HD, %</b> | 39                             | 34                            | 0.01     |
| <b>Comorbidities</b>                  |                                |                               |          |
| Diabetes                              | 63                             | 61                            | 0.005    |
| Hypertension                          | 53                             | 54                            | 0.20     |
| Congestive heart failure              | 20                             | 20                            | 0.50     |
| Atherosclerotic heart disease         | 17                             | 16                            | 0.05     |
| Other cardiovascular                  | 15                             | 15                            | 0.90     |
| Dyslipidemia                          | 47                             | 45                            | 0.0005   |
| <b>Weekly Kt/Vurea</b>                |                                |                               |          |
| Peritoneal                            | 1.50 ± 0.42                    | 1.49 ± 0.46                   | 0.34     |
| Residual renal                        | 0.99 ± 0.78                    | 1.01 ± 0.83                   | 0.17     |
| Total                                 | 2.50 ± 0.77                    | 2.52 ± 0.83                   | 0.12     |
| <b>Median weekly ESA dose, units</b>  | 4864<br>(1430, 11190)          | 4868<br>(1500, 11440)         | 0.0163   |
| <b>Laboratory parameters</b>          |                                |                               |          |
| Hemoglobin, g/dl                      | 11.6 ± 1.3                     | 11.4 ± 1.40                   | <0.0001  |
| Albumin, g/dl                         | 3.6 ± 0.5                      | 3.6 ± 0.49                    | 0.10     |
| Calcium, mg/dl                        | 9.1 ± 0.6                      | 9.1 ± 0.67                    | 0.05     |
| Phosphorus, mg/dl                     | 5.0 ± 1.3                      | 5.1 ± 1.33                    | 0.0009   |
| Parathyroid hormone, pg/ml            | 292 (183, 469)                 | 294 (181, 485)                | 0.0004   |
| Creatinine, mg/dl                     | 7.2 ± 3.6                      | 7.1 ± 3.55                    | 0.34     |
| Potassium, meq/L                      | 4.2 ± 0.5                      | 4.3 ± 0.57                    | <0.0001  |
| <b>Use of APD, %</b>                  |                                |                               |          |
| Initial                               | 52                             | 68                            | <0.0001  |
| Ever through follow-up                | 88                             | 83                            | <0.0001  |
| <b>Geographic location, %</b>         |                                |                               |          |
| Northeast                             | 8                              | 10                            | <0.0001  |
| Midwest                               | 20                             | 20                            | 0.30     |
| West                                  | 47                             | 46                            | 0.02     |

|                                          |      |      |         |
|------------------------------------------|------|------|---------|
| South                                    | 25   | 24   | 0.14    |
| <b>Year of incidence</b>                 |      |      |         |
| 2007                                     | 17   | 24   | <0.0001 |
| 2008                                     | 22   | 17   | <0.0001 |
| 2009                                     | 24   | 17   | <0.0001 |
| 2010                                     | 24   | 22   | <0.0001 |
| 2011                                     | 13   | 20   | <0.0001 |
| <b>Outcomes</b>                          |      |      |         |
| Expired, %                               | 12   | 12   | 0.65    |
| Transfer to in-center hemodialysis, %    | 22   | 23   | 0.23    |
| Number of hospitalizations /patient-year | 1.20 | 1.36 | 0.08    |
| Transplant, %                            | 9    | 7    | <0.0001 |

**Supplementary Table 2** Summary of parameters from PET

| Parameter                                             | Results<br>(n=10,142) |
|-------------------------------------------------------|-----------------------|
| Interval from date of start of PD to PET, days*       | 39 (28, 61)           |
| Interval from date of start of dialysis to PET, days* | 96 (56, 188)          |
| Preceding overnight exchange:                         |                       |
| Dwell time, minutes                                   | 600 ± 104             |
| Drain volume, ml                                      | 2088 ± 510            |
| Dialysate creatinine (corrected), mg/dl               | 7.35 ± 3.16           |
| Dialysate urea, mg/dl                                 | 60.0 ± 18.9           |
| Dialysate glucose, mg/dl*                             | 396 (282, 538)        |
| Dialysate Volume, ml:                                 |                       |
| Infused                                               | 2003 ± 171            |
| Drained                                               | 2284 ± 309            |
| Ultrafiltration volume                                | 281 ± 254             |
| Serum levels:                                         |                       |
| Urea nitrogen, mg/dl                                  | 52 ± 16               |
| Creatinine, mg/dl                                     | 7.2 ± 3.6             |
| Glucose, mg/dl                                        | 160 ± 70              |
| Albumin, g/dl                                         | 3.6 ± 0.5             |
| Ratios:                                               |                       |
| 4-hour D/P creatinine (corrected)                     | 0.65 ± 0.12           |
| 4-hour D/D0 glucose                                   | 0.40 ± 0.09           |
| 4-hour D/P urea                                       | 0.92 ± 0.07           |

Data are presented as mean ± standard deviation, except when indicated by \* where they are presented as median with interquartile range.

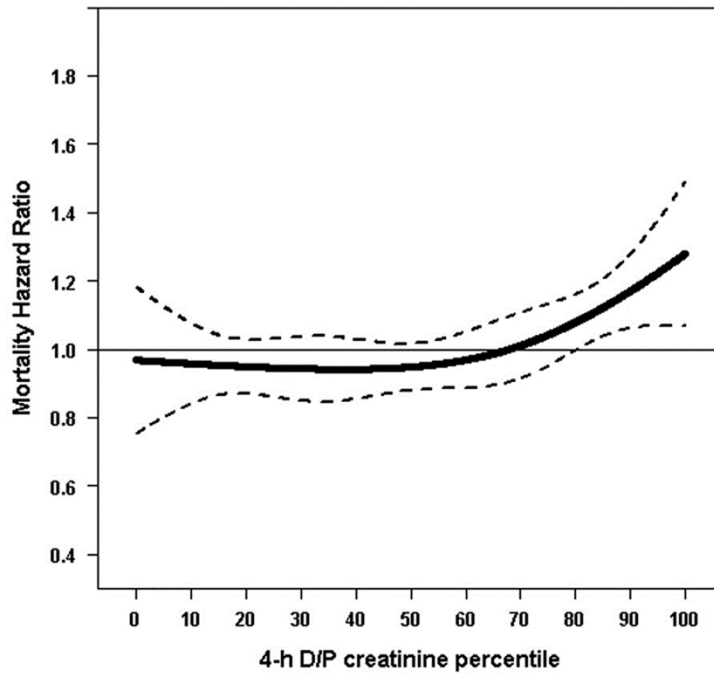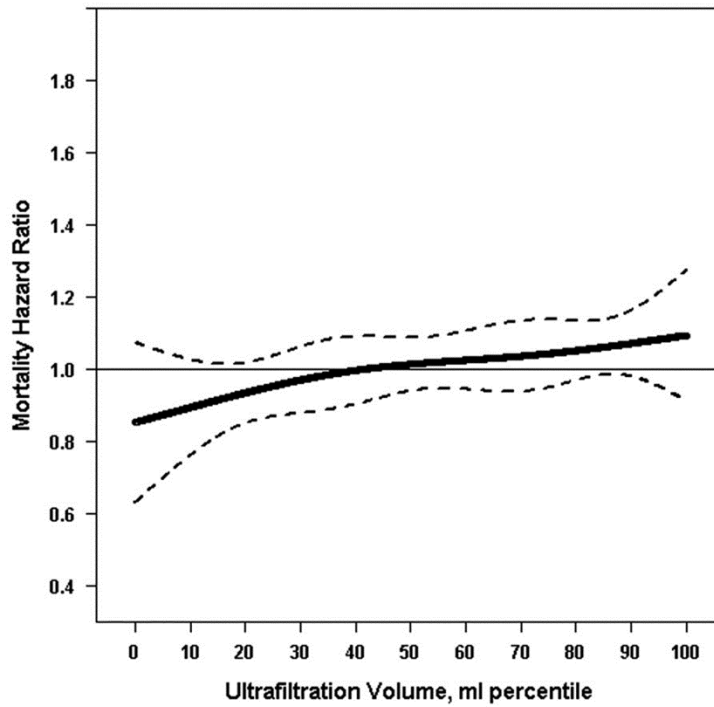

**Supplementary Figure 1:** Cubic splines demonstrating the association of percentile rank of 4-h D/P creatinine, and ultrafiltration volume from the Peritoneal Equilibration Test with all-cause mortality

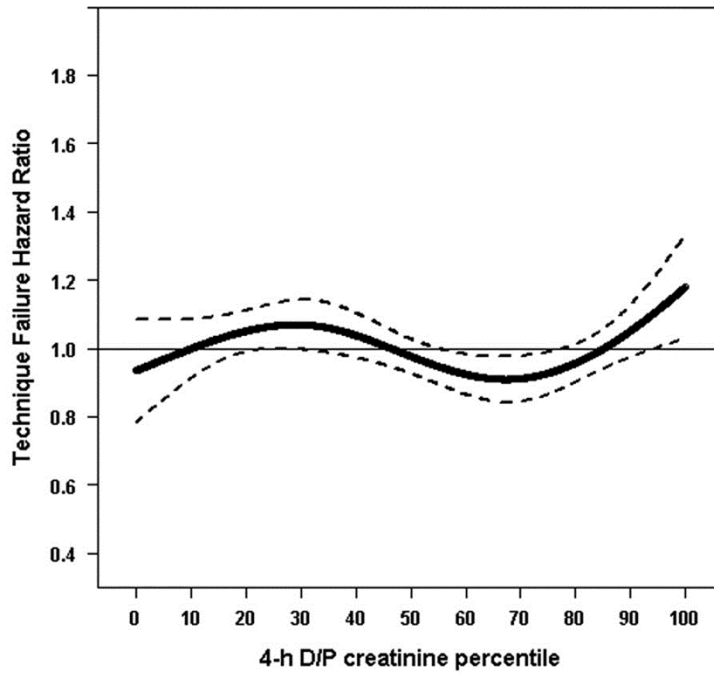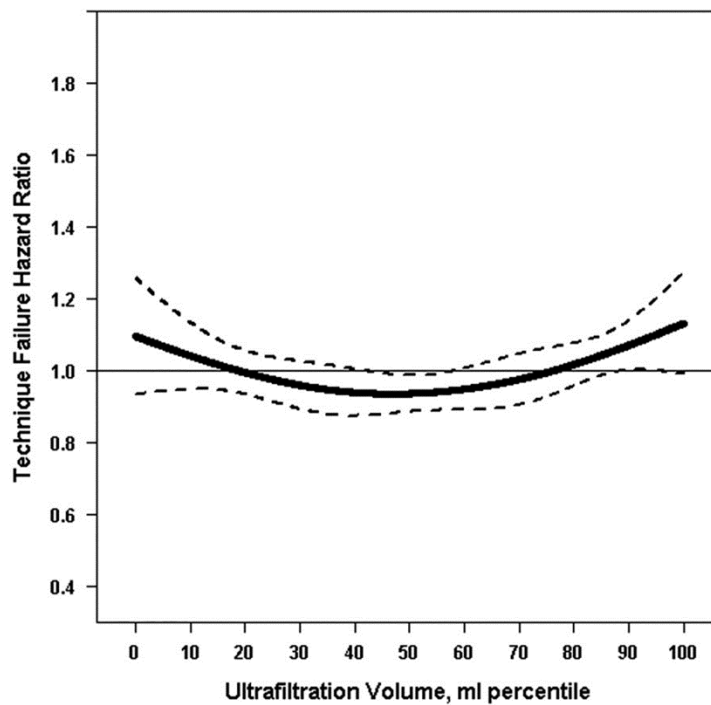

**Supplementary Figure 2:** Cubic splines demonstrating the association of percentile rank of 4-h D/P creatinine, and ultrafiltration volume from the Peritoneal Equilibration Test with technique failure

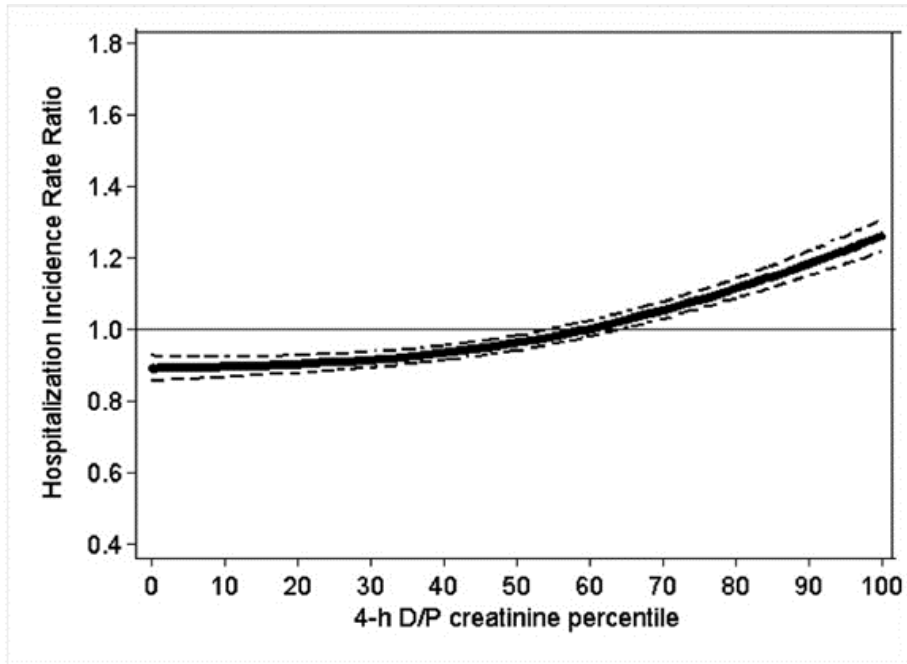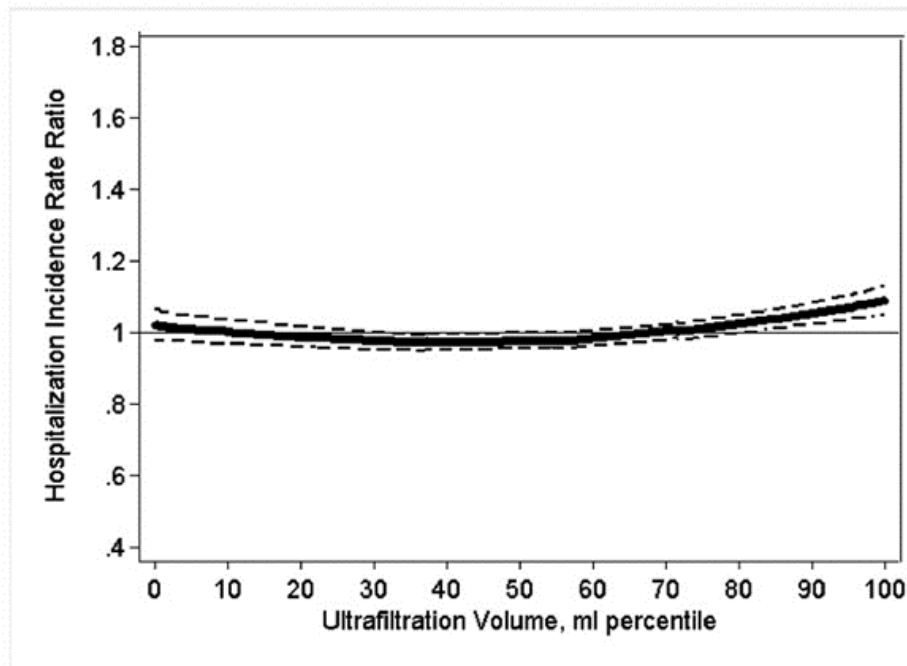

**Supplementary Figure 3:** Cubic splines demonstrating the association of percentile rank of 4-h D/P creatinine, and ultrafiltration volume from the Peritoneal Equilibration Test with hospitalization rate
